# Supplementary material
Source: MDPI journal article supplement (https://www.mdpi.com/2571-9637/6/4/34)
Supplement: s1 [file s1]

**Supplementary Material**

1. FT-IR spectra of BS2, BS4 and BS8 (Figure S1-S3).....page 2
2.  $^1\text{H}$  NMR and  $^{13}\text{C}$  NMR spectra of BS2 (Figure S4-S5)..... page 3-4
3.  $^1\text{H}$  NMR and  $^{13}\text{C}$  NMR spectra of BS4 (Figure S6-S7).....page 5-6
4.  $^1\text{H}$  NMR and  $^{13}\text{C}$  NMR spectra of BS8 (Figure S8-9).....page 7-8

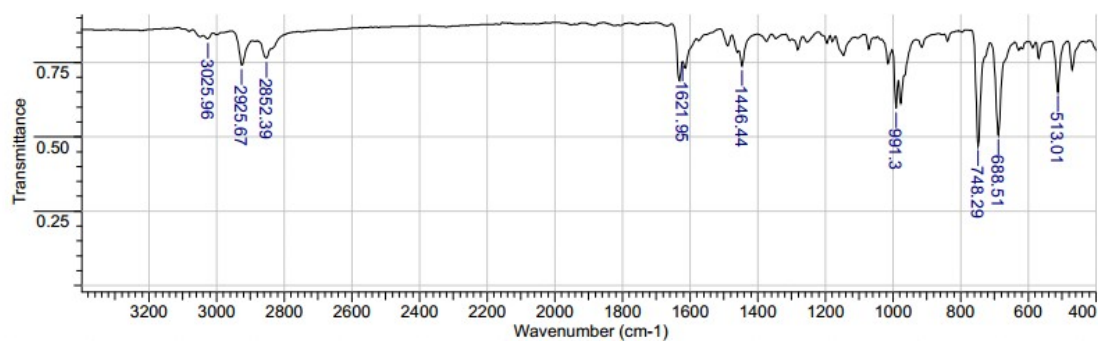

Figure S1. FT-IR (apt mode) spectrum of BS2

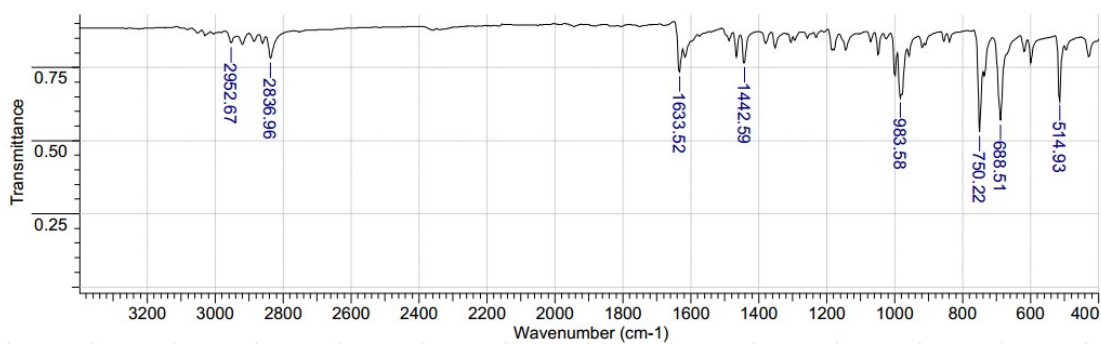

Figure S2. FT-IR (apt mode) spectrum of BS4

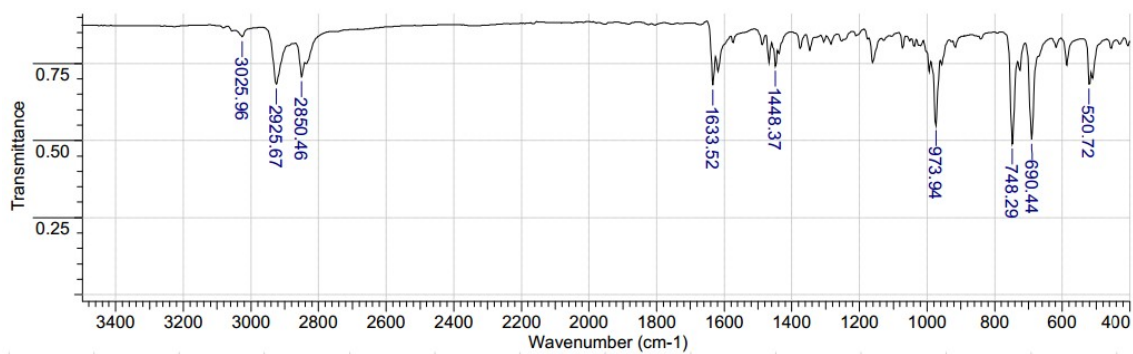

Figure S3. FT-IR (apt mode) spectrum of BS8

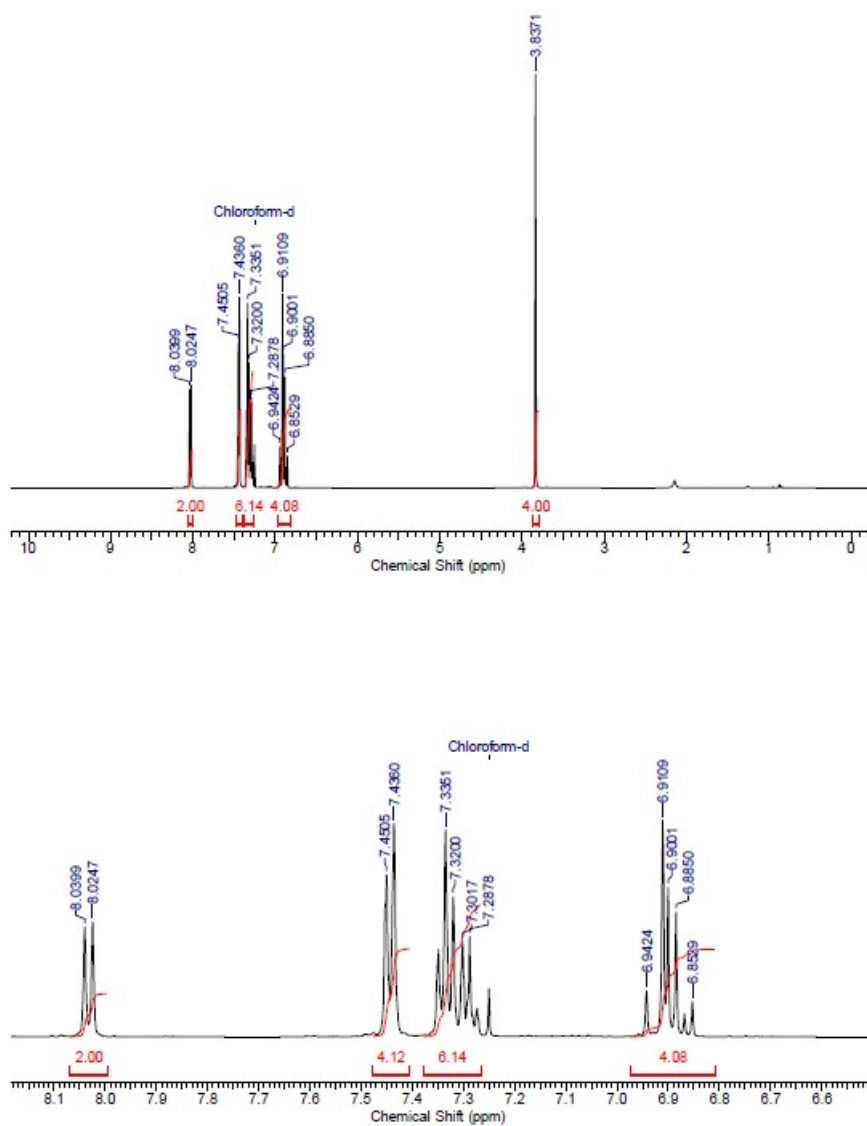

Figure S4.  $^1\text{H}$  NMR, in chloroform, of BS2

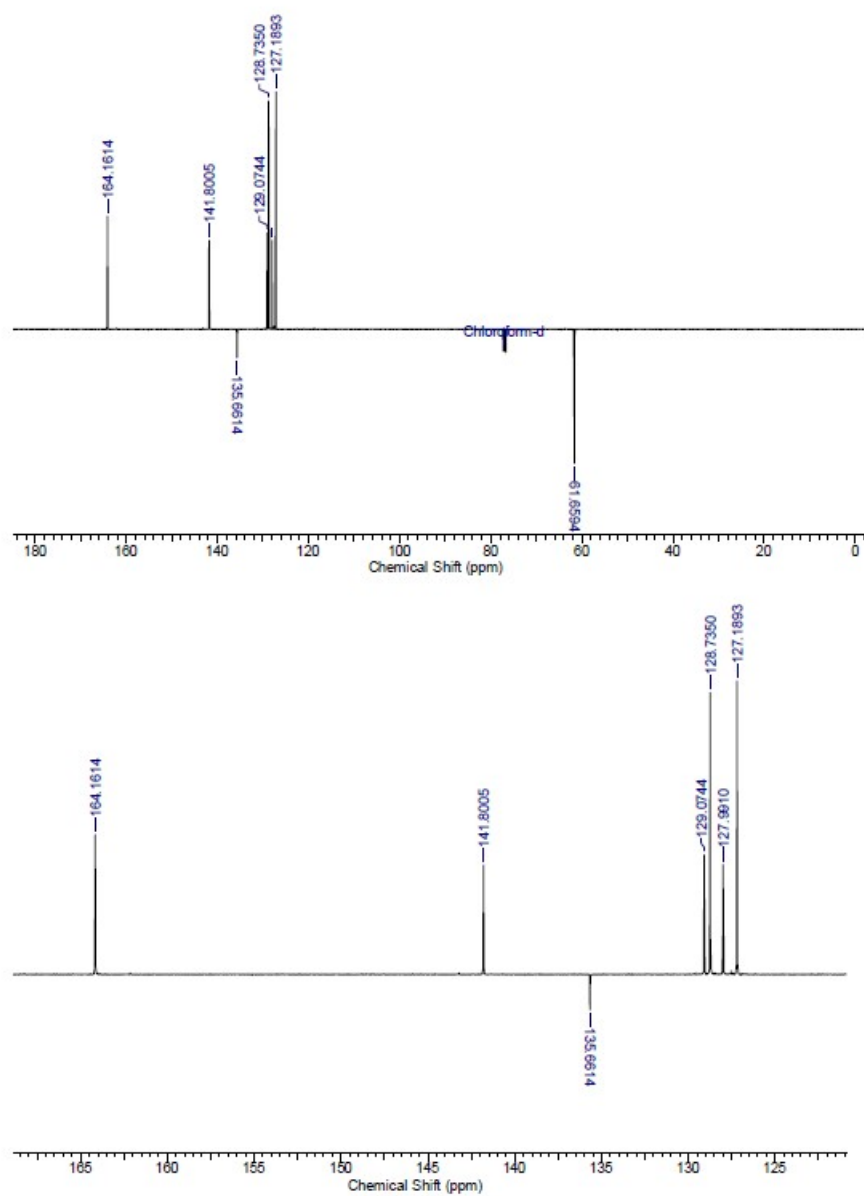

Figure S5.  $^{13}\text{C}$  NMR spectrum, in chloroform, of BS2

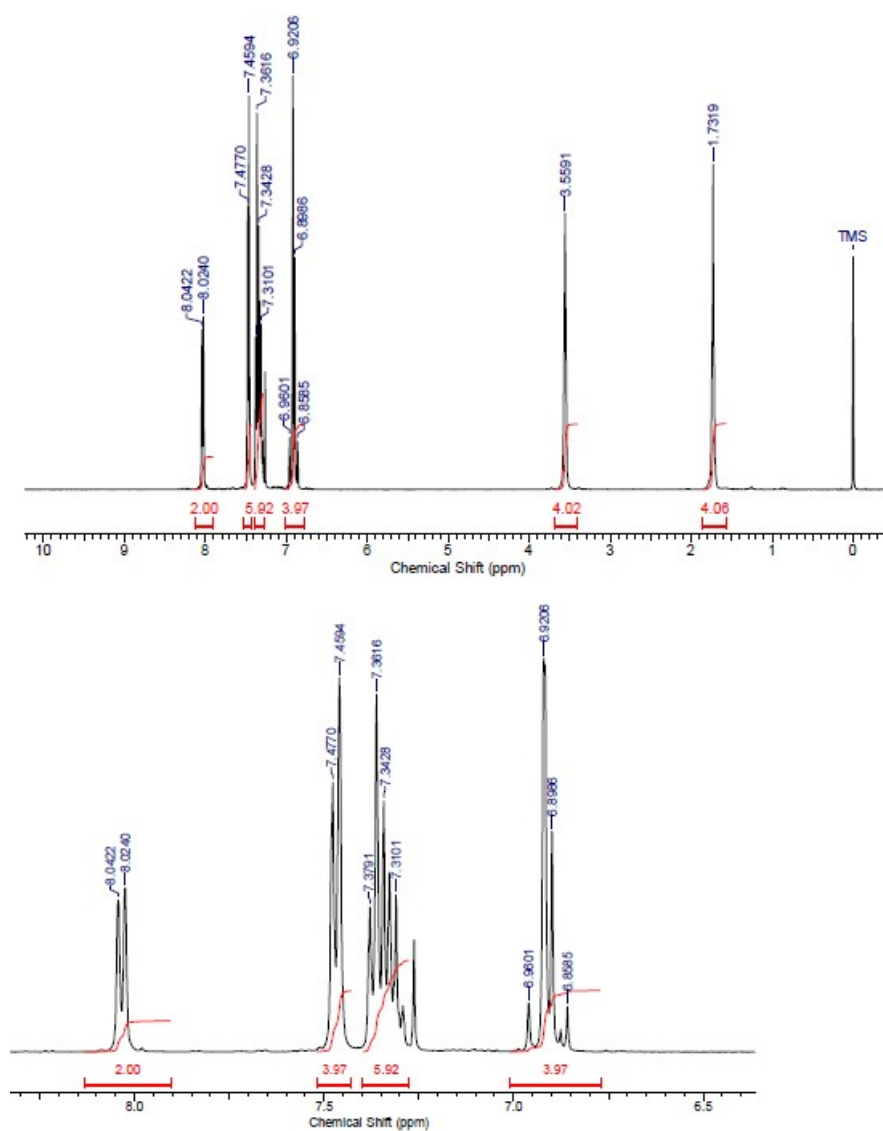

Figure S6.  $^1\text{H}$  NMR spectrum, in chloroform, of BS4

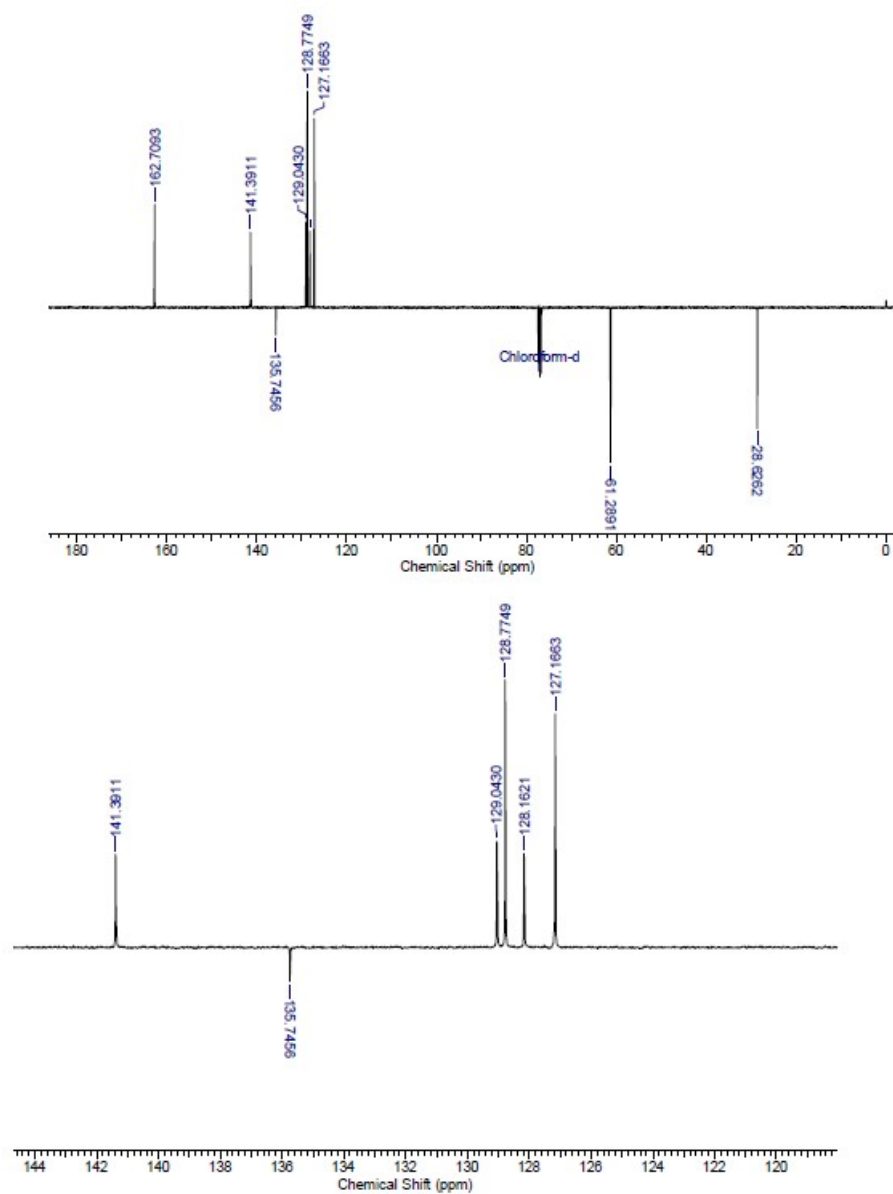

Figure S7.  $^{13}\text{C}$  NMR spectrum, in chloroform, of BS4

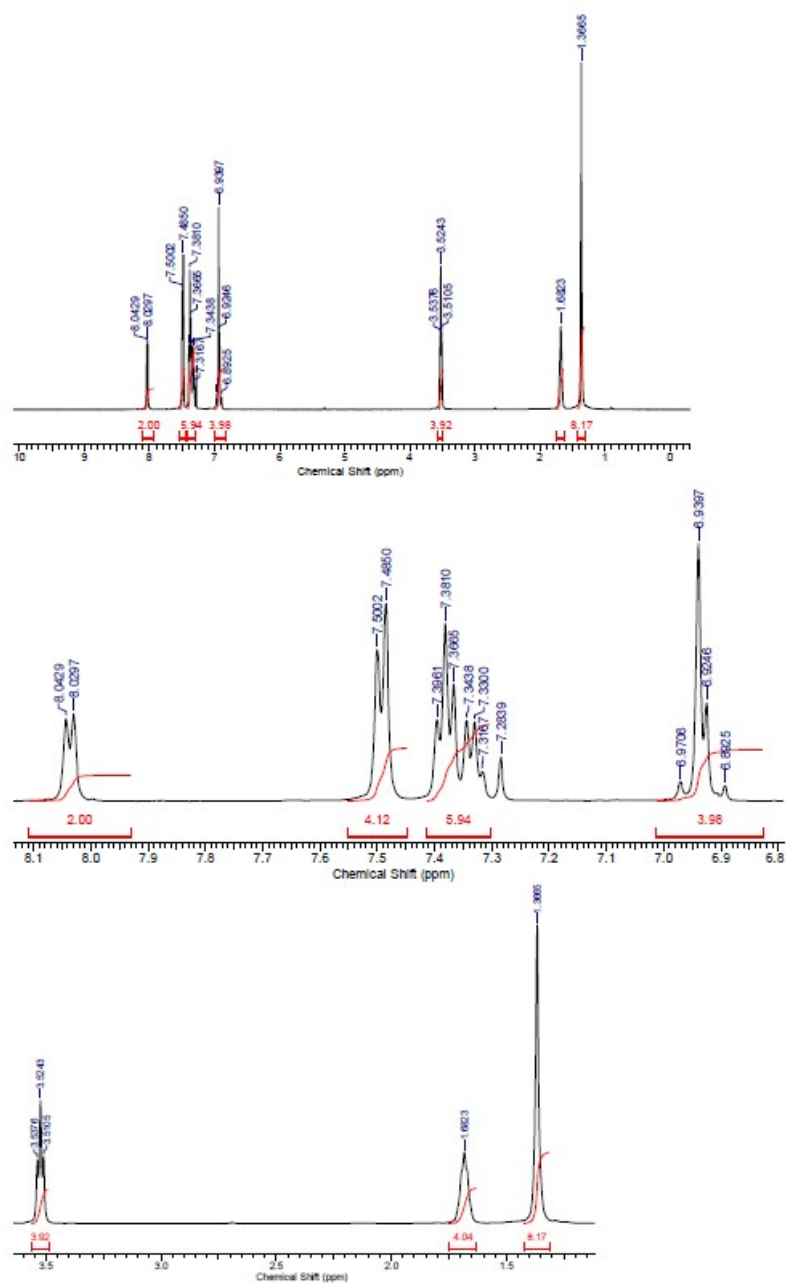

Figure S8.  $^1\text{H}$  NMR spectrum, in chloroform, of BS8

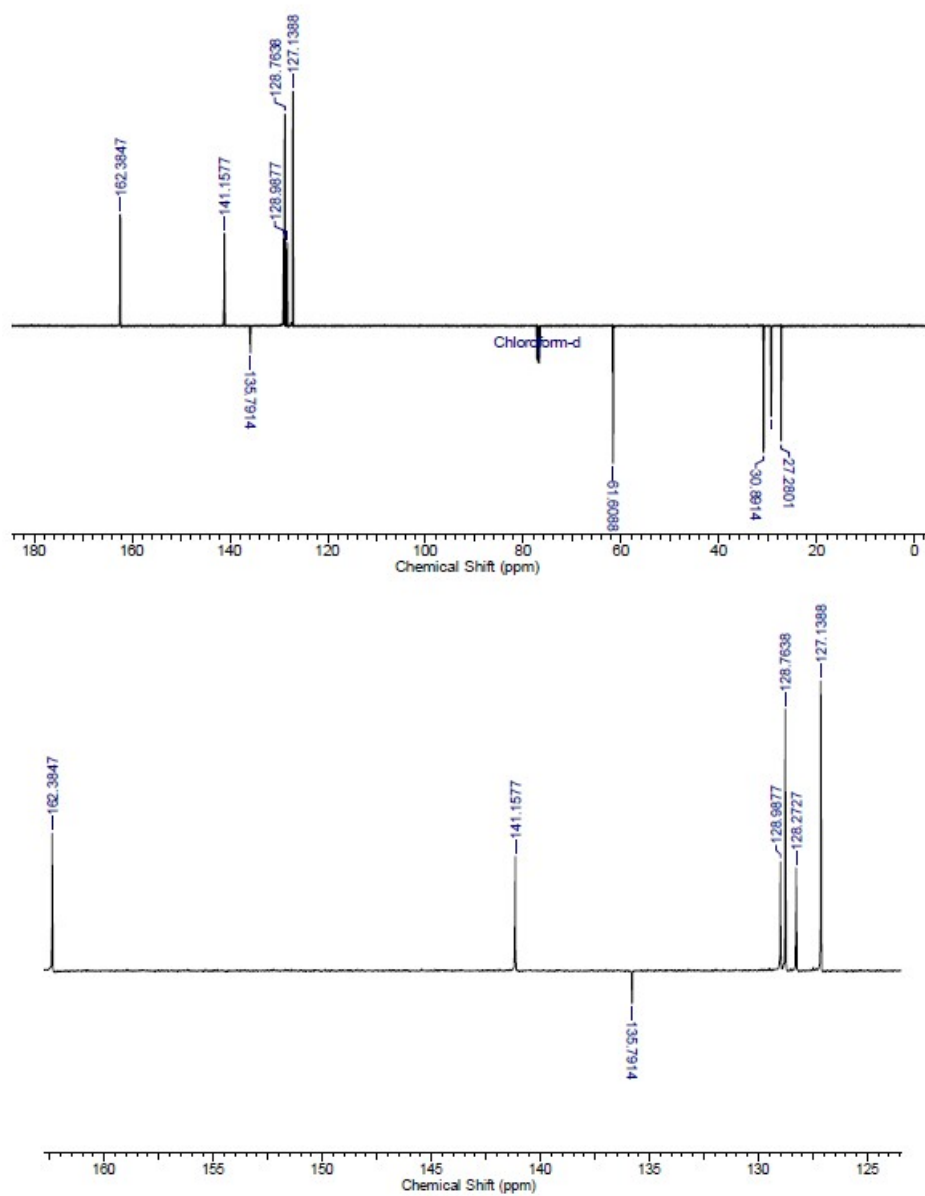

Figure S9.  $^{13}\text{C}$  NMR spectrum, in chloroform, of BS8
